# Supplementary material for: A DBU–diheteroaryl halide adduct as the fastest current N-diheteroarylating agent
Source: Royal Society of Chemistry journal article supplement (doi:10.1039/c3ra43179g), 2013-01-01
Supplement: c3ra43179g.pdf [file c3ra43179g.pdf]

## Supporting information

### **DBU-diheteroaryl halide adduct as fastest N-diheteroaryllating agent.**

Sanjeev K. Verma, B.N. Acharya, Ramarao Ghorpade, Ajay Pratap and M. P. Kaushik\*

Process Technology Development Division, Defence R & D Establishment, Jhansi Road, Gwalior-474002 (MP)  
India

Fax: +91(751)2340042, E-mail: mpkaushik@rediffmail.com

#### **Contents**

|                                                                            |            |
|----------------------------------------------------------------------------|------------|
| <b>1. General procedure</b>                                                | <b>2</b>   |
| <b>2. UV-VIS study for the formation of DBU-diheteroaryl halide adduct</b> | <b>3-9</b> |
| <b>3. NMR Spectra of 4-(benzothiazol-2-yl) morpholine</b>                  | <b>10</b>  |
| <b>4. NMR Spectra of 4-(2-chloro-5-nitropyrimidin-4-yl)morpholine</b>      | <b>11</b>  |

### **Synthesis of Benzothiazol-2-yl-morpholine (General Procedure 1).**

In a test tube 0.01 mol of 2-chlorobenzothiazole and 0.01 mol of DBU was added. A dirty green coloured solution was formed. To this solution add 0.01 mol of Morpholine. White coloured precipitate was formed within 5 minutes at room temperature. The precipitate was washed with water to remove DBU.HCl salt formed in the reaction.

### **Synthesis of Benzothiazol-2-yl-morpholine (General Procedure 2).**

In a test tube 0.01 mol of 2-chlorobenzothiazole and 0.001 mol of DBU and 0.009 mol of NaHCO<sub>3</sub> or Na<sub>2</sub>CO<sub>3</sub> were added. A dirty green coloured mass was formed. To this solution 0.01 mol of Morpholine was added. The reaction mixture was mixed with spatula. Water was added in the reaction mixture. White coloured precipitates were filtered off.

**Note:** All the compounds reported in table 1 are known compounds. Spectra related to these compounds is available in Verma, S.K.; Acharya, B.N.; Kaushik, M.P.; *Org.Biomol.Chem.* **2011**, 9, 1324.

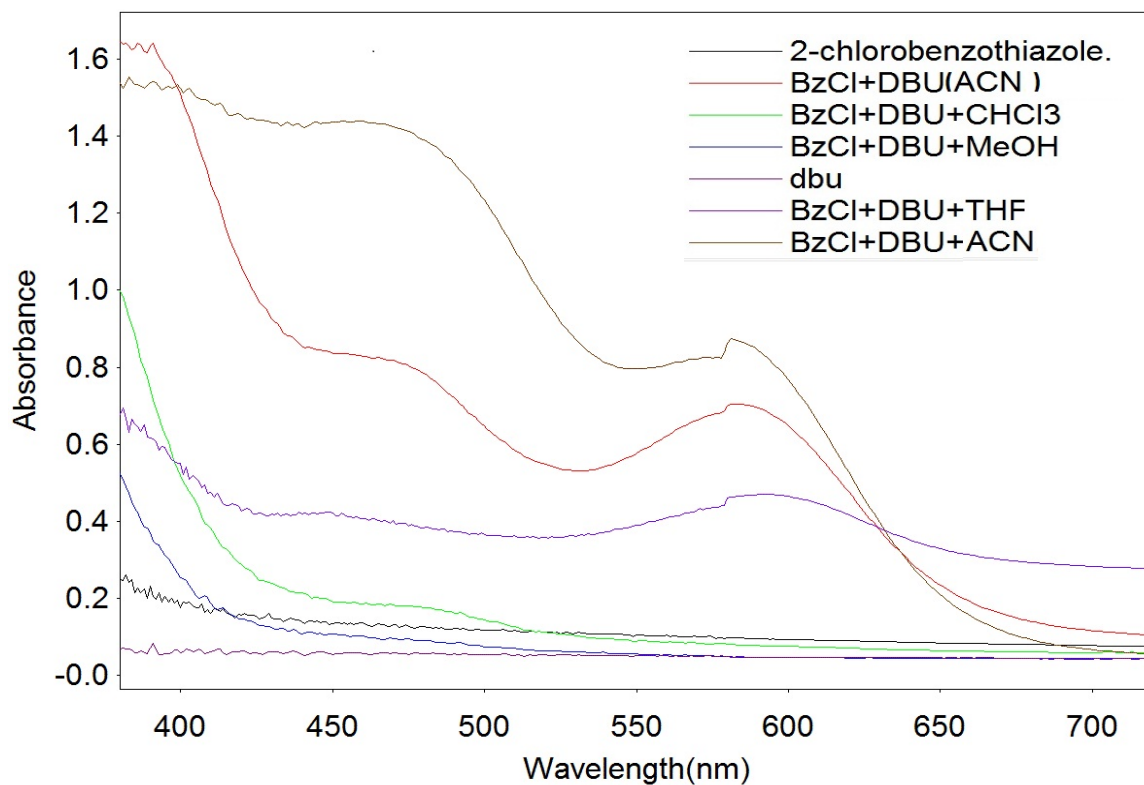

**Figure 1: Effect of Solvent on the stability of DBU-ArCl Adduct.**

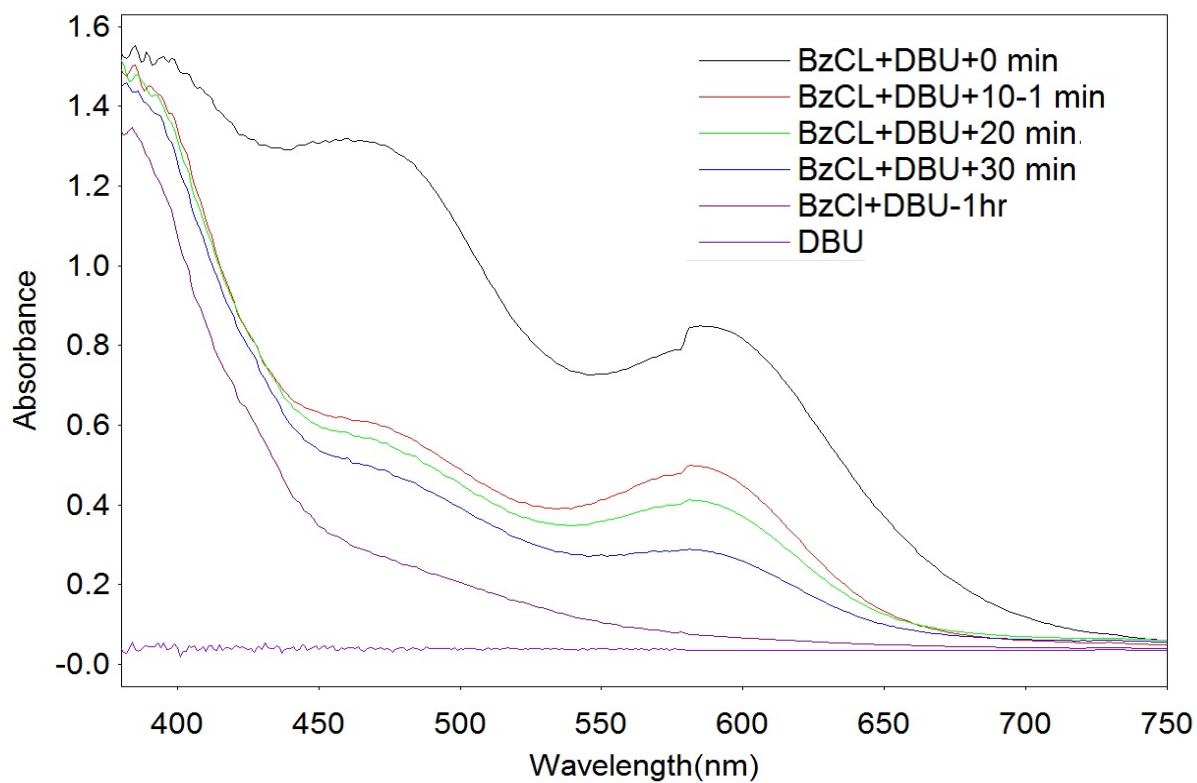

**Figure 2: Effect of Time on the stability of DBU-ArCl Adduct.**

**Note:**

BzCl-----2-chlorobenzothiazole

BzCl +DBU + Solvent-----2-chlorobenzothiazole mixed with equimolar ratio of DBU and then diluted with respective solvent.

BzCl+DBU(ACN)----- 2-chlorobenzothiazole and DBU were dissolved in acetonitrile separately and then mixed.

⑫

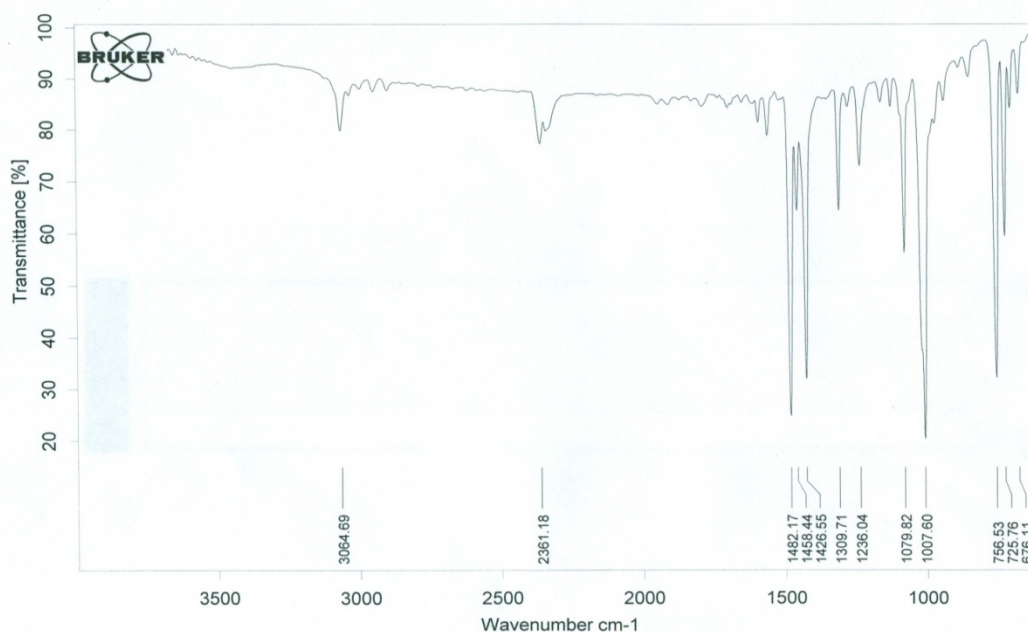

C:\WISHWAKARMA\BzCl-2.0 BzCl-2 SOLID

10/12/2012

Figure 3: FTIR spectra of 2-chlorobenzothiazole.

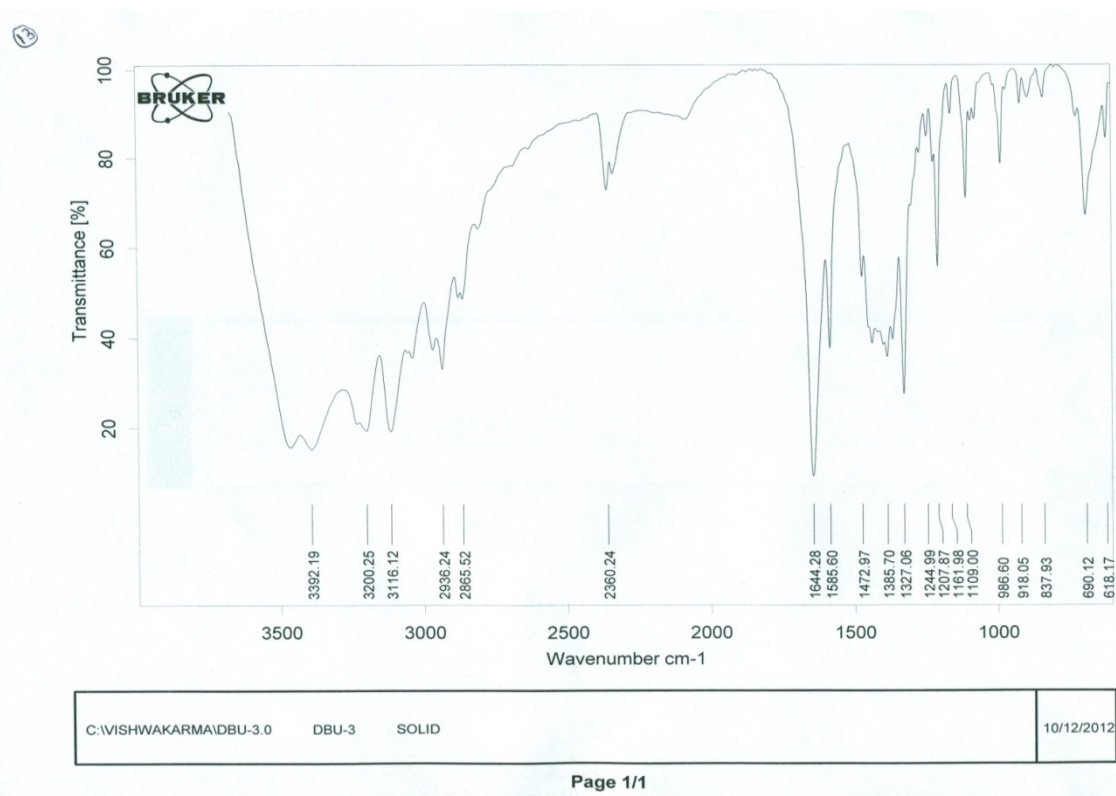

Figure 4: FTIR spectra of DBU.

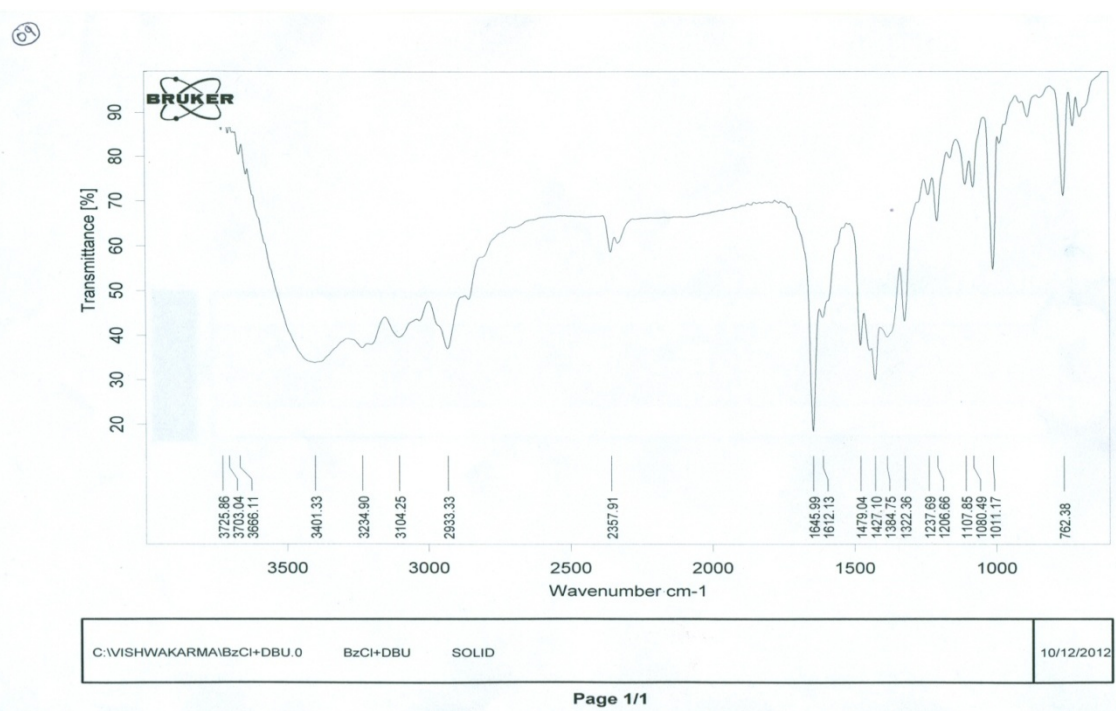

Figure 5: FTIR spectra of DBU-2-chlorobenzothiazole adduct



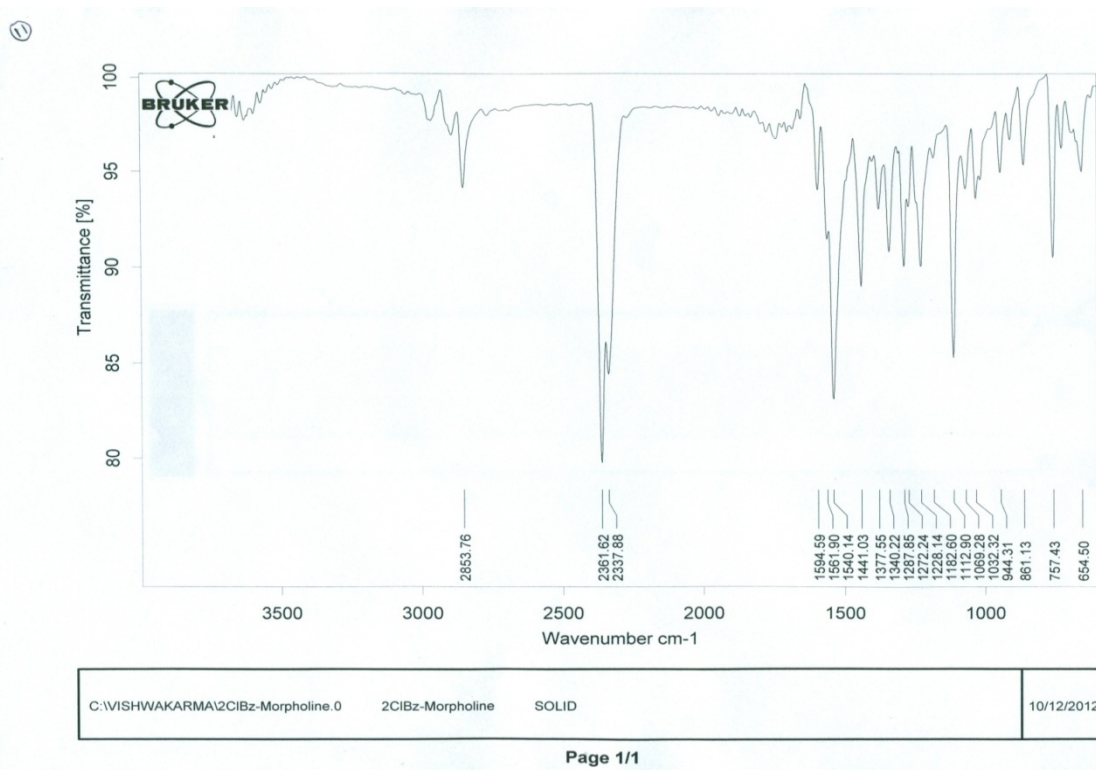

Figure 6: FTIR spectra of 4-(benzothiazol-2-yl) morpholine

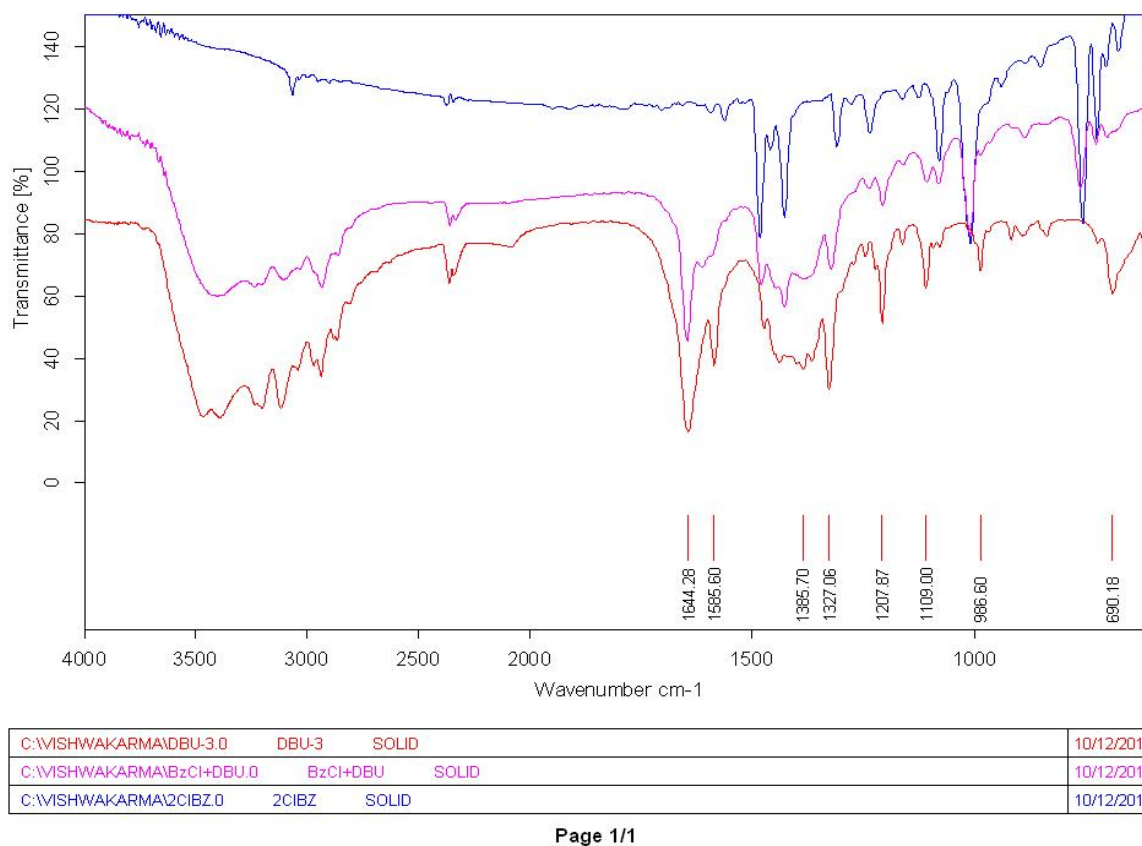

Figure 7: FTIR spectra of 2-chlorobenzothiazole, DBU-2-chlorobenzothiazole adduct and DBU.

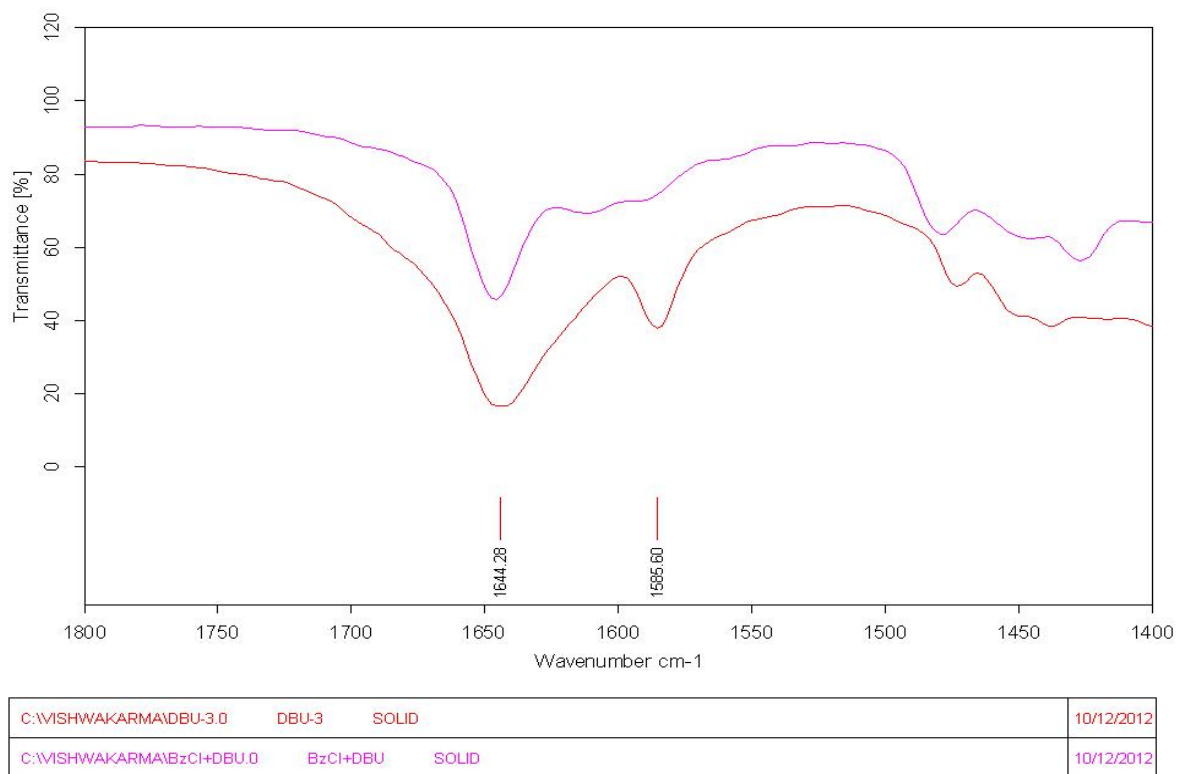

Page 1/1

Figure 8: FTIR spectra showing shift in the value of DBU at 1585 to 1611 with decrease in intensity.

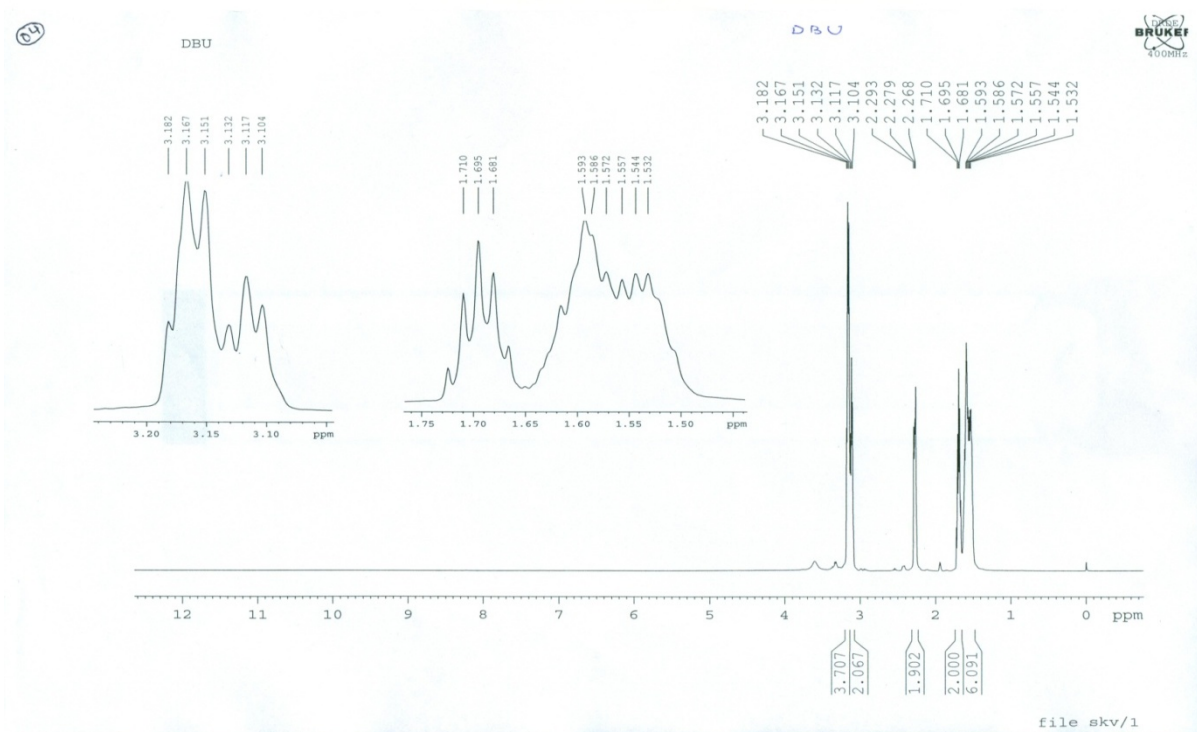

Figure 9: <sup>1</sup>H-NMR of DBU

63

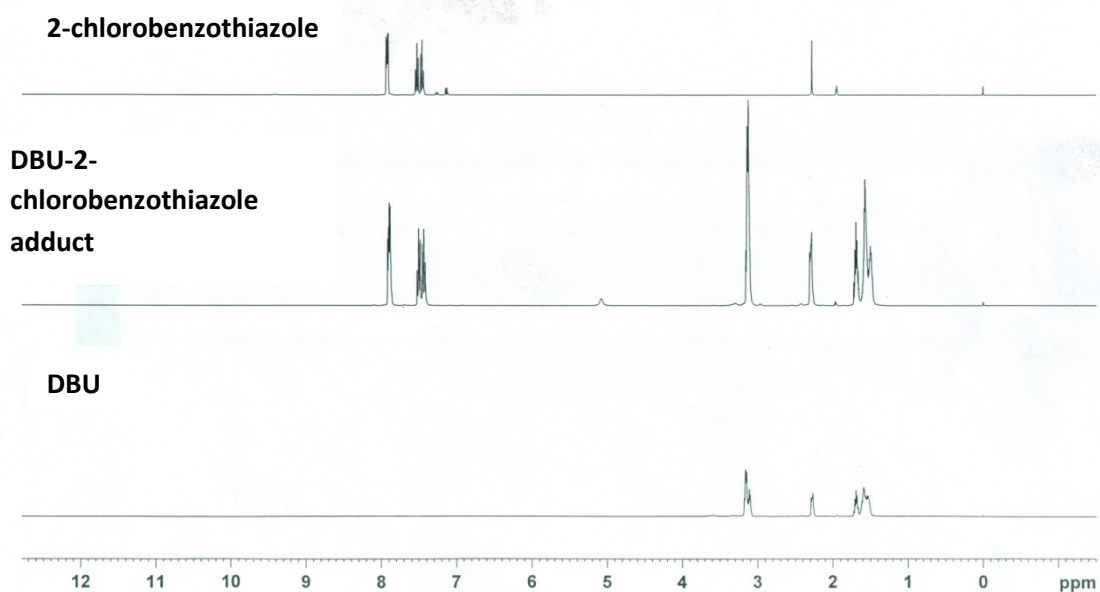

Figure 10:  $^1\text{H-NMR}$  of 2-chlorobenzothiazole, 2-chlorobenzothiazole-DBU adduct and DBU

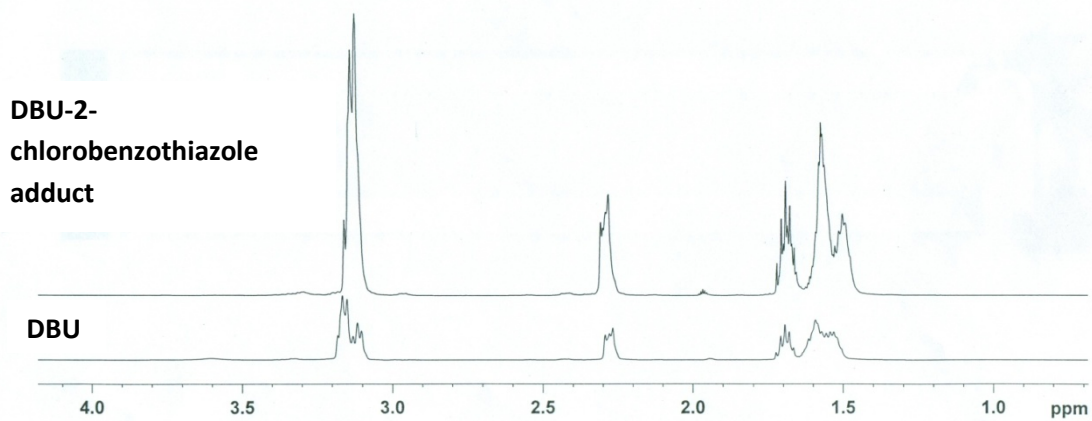

Figure 11:  $^1\text{H-NMR}$  of DBU-2-chlorobenzothiazole adduct and DBU showing shifting.



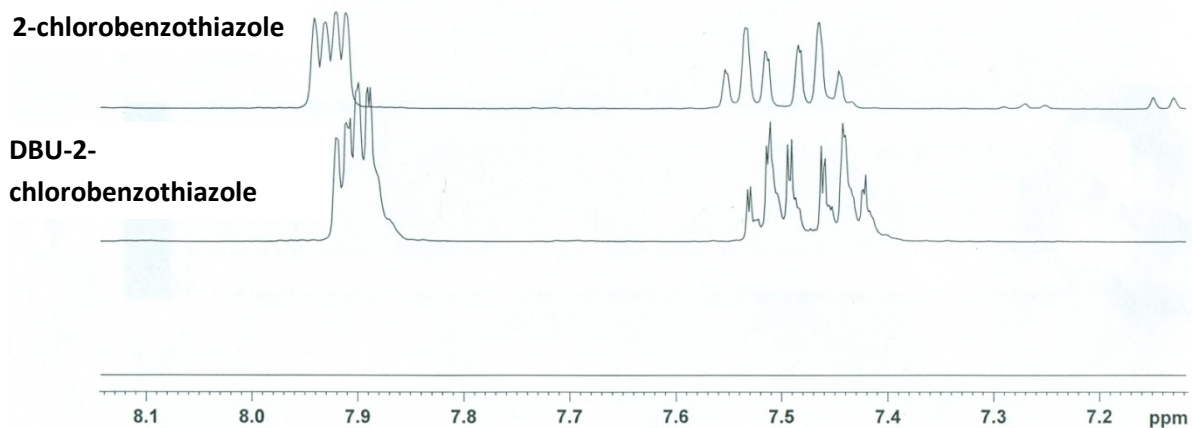

Figure 12: <sup>1</sup>H-NMR of 2-chlorobenzothiazole and DBU-2-chlorobenzothiazole adduct showing shifting and splitting in the peaks.

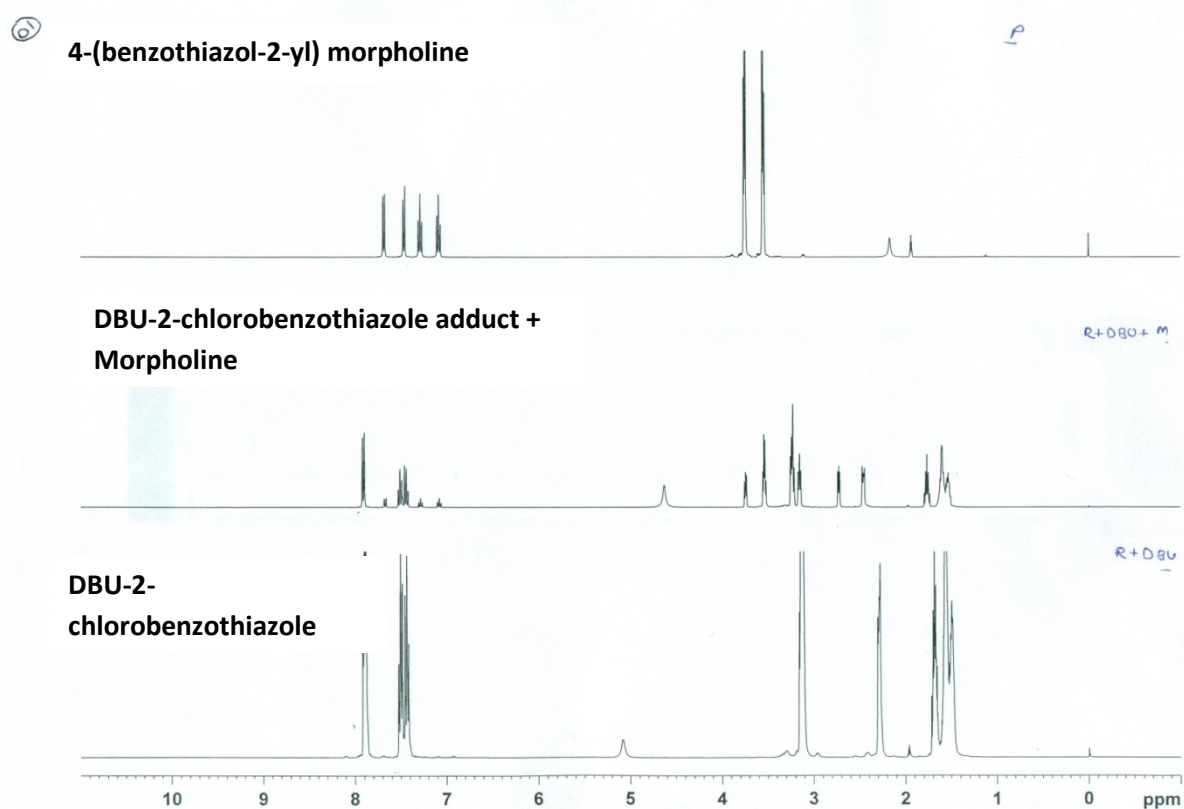

Figure 13: <sup>1</sup>H-NMR of 4-(benzothiazol-2-yl) morpholine, DBU-2-chlorobenzothiazole adduct and morpholine in acetonitrile (after 20 minutes) and 2-chlorobenzothiazole-DBU adduct. The spectra showing the formation of 4-(benzothiazol-2-yl) morpholine, however; conversion is not complete.

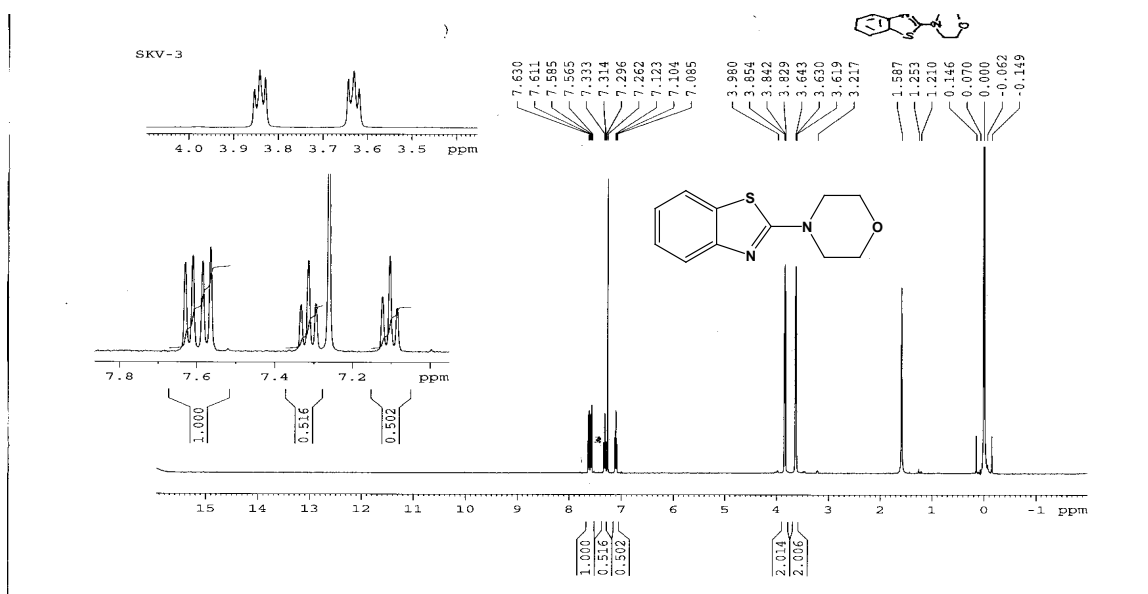

Figure 14:  $^1\text{H}$  NMR of 2-Morpholin-4-yl-benzothiazole ( $\text{CDCl}_3$ )

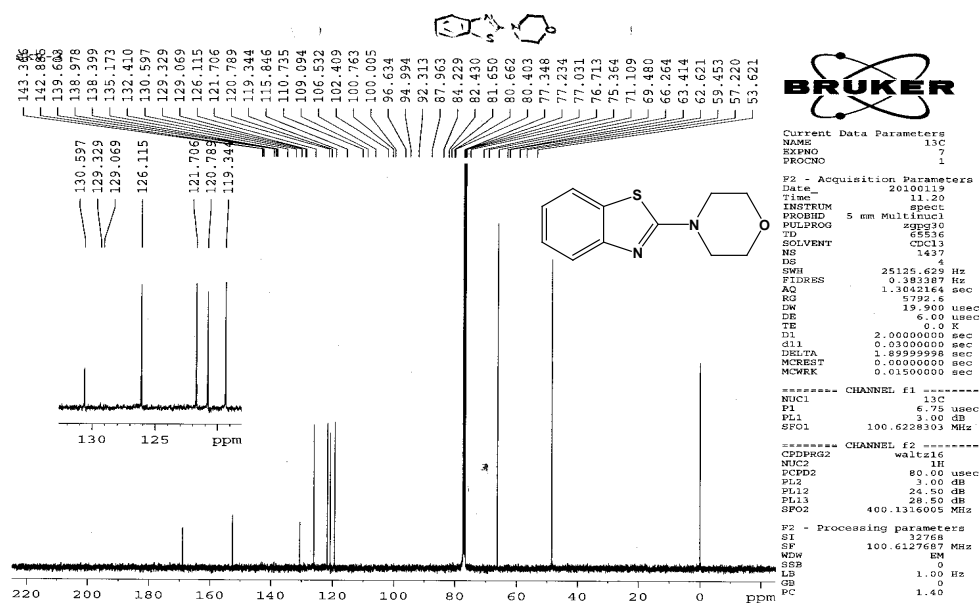

Figure 15:  $^{13}\text{C}$  NMR of 2-Morpholin-4-yl-benzothiazole ( $\text{CDCl}_3$ )

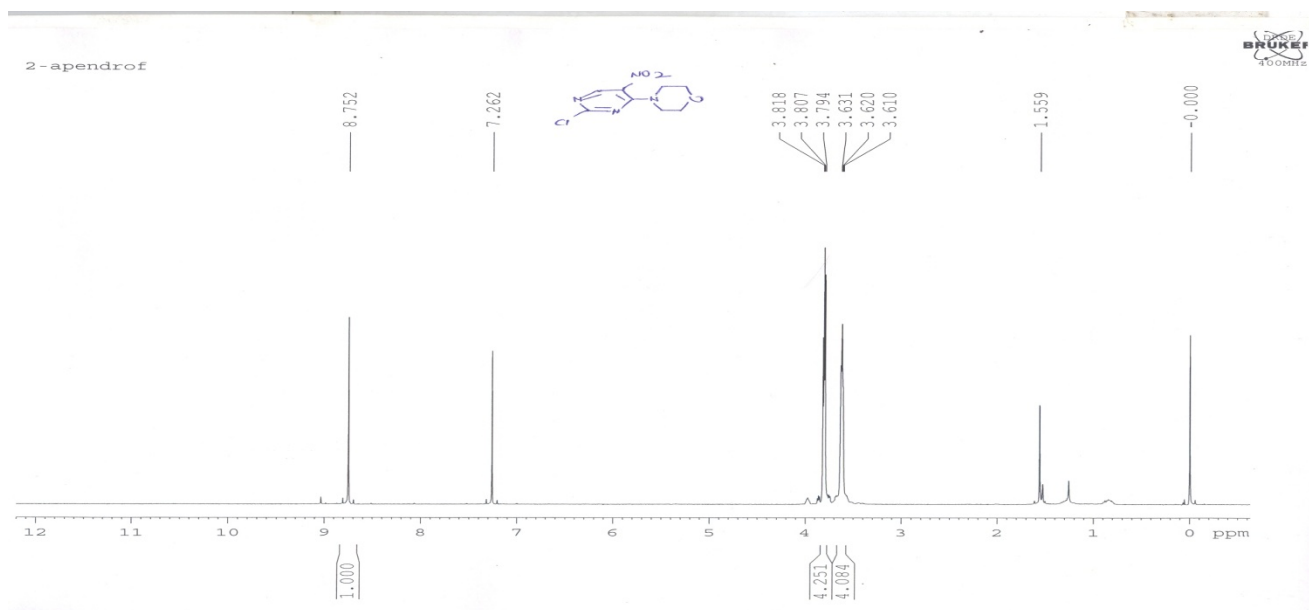

Figure 15:  $^1\text{H}$  NMR of 4-(2-chloro-5-nitropyrimidin-4-yl)morpholine ( $\text{CDCl}_3$ )

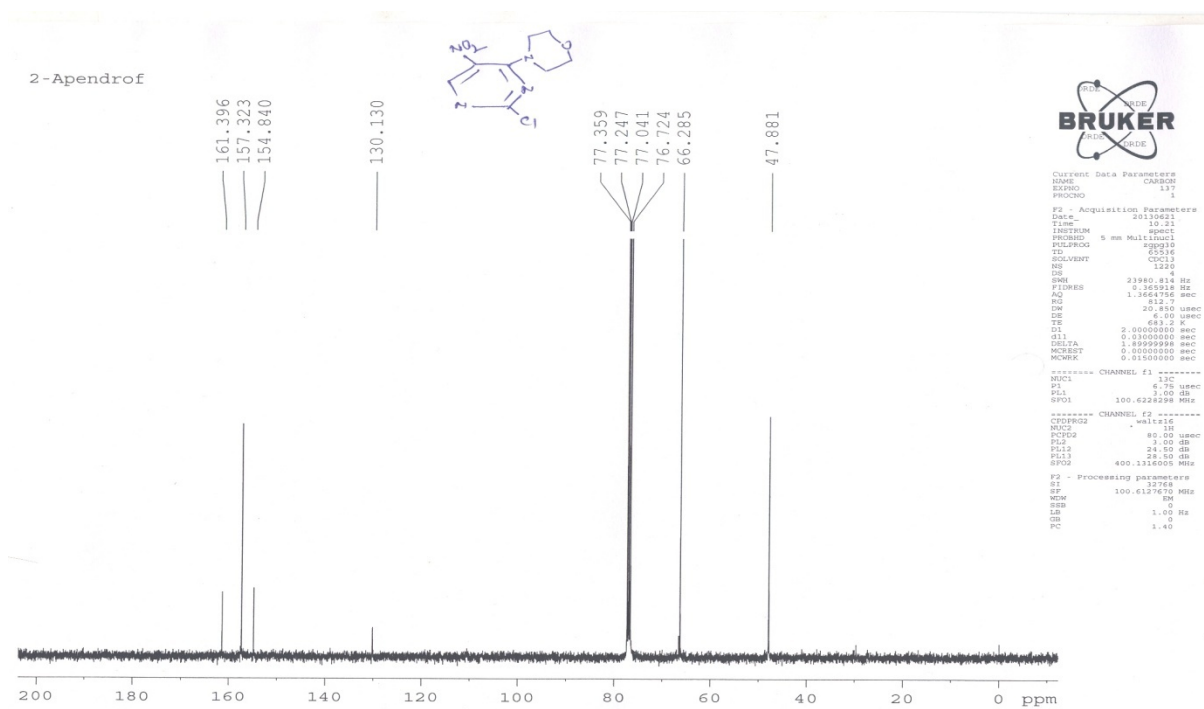

Figure 15:  $^{13}\text{C}$  NMR of 4-(2-chloro-5-nitropyrimidin-4-yl)morpholine ( $\text{CDCl}_3$ )
